# Supplementary material for: Covalent organic frameworks anchored with frustrated Lewis pairs for hydrogenation of alkynes with H2
Source: Royal Society of Chemistry journal article supplement (doi:10.1039/d1ta08916a), 2021-12-10
Supplement: d1ta08916a1.pdf [file d1ta08916a1.pdf]

## Covalent Organic Frameworks Anchored with Frustrated Lewis Pairs for Hydrogenation of Alkynes with H<sub>2</sub>

Qiang Liu<sup>+</sup>, Qiaobo Liao<sup>+</sup>, Jinling Hu, Kai Xi<sup>\*</sup>, Youting Wu<sup>\*</sup> and Xingbang Hu<sup>\*</sup>

Table of Contents

1. Results and discussion
2. Original MS data

1. Results and discussion

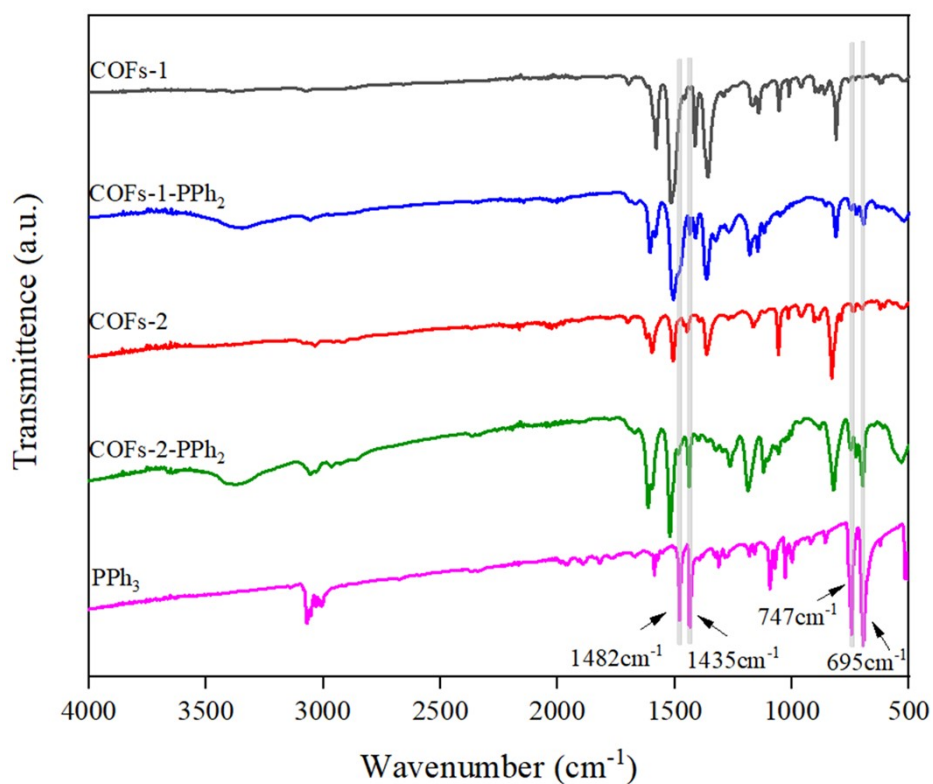

Figure S1. The FT-IR spectra of COFs-1, COFs-1-PPh<sub>2</sub>, COFs-2, COFs-2-PPh<sub>2</sub> and PPh<sub>3</sub>.

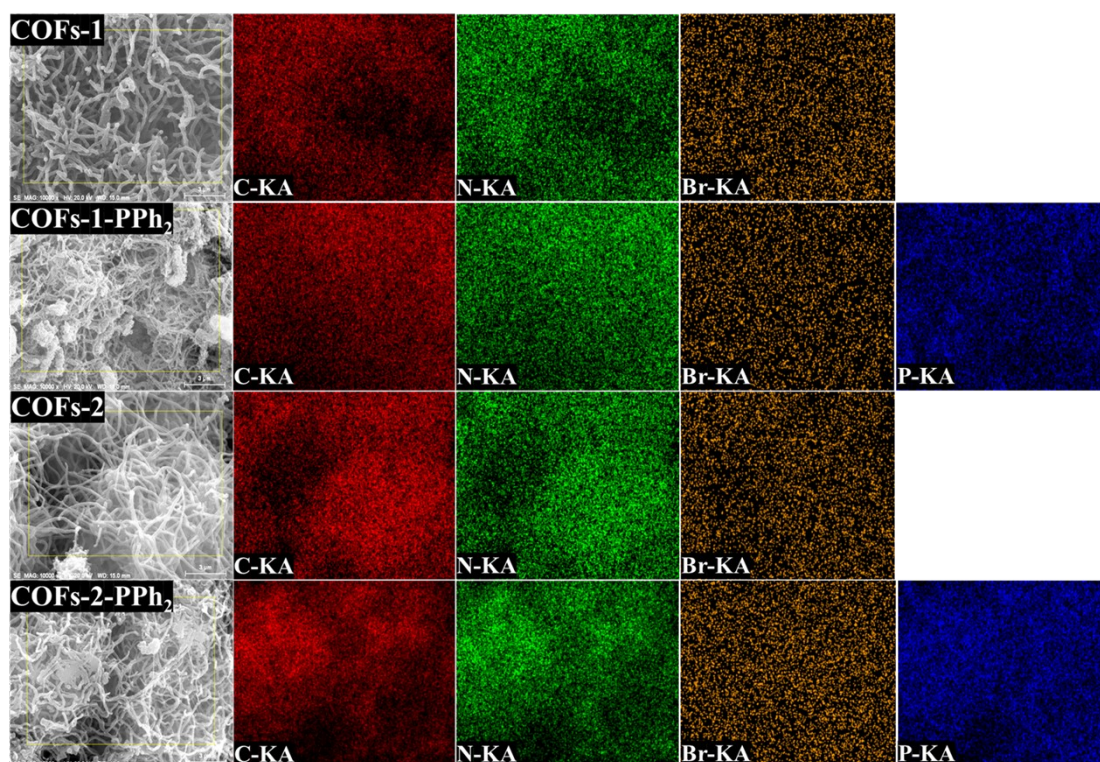

Figure S2. The EDX mapping images of COFs-1, COFs-1-PPh<sub>2</sub>, COFs-2 and COFs-2-PPh<sub>2</sub>.

Table S1. Elemental contents of COFs-1, COFs-2, COFs-1-PPh<sub>2</sub> and COFs-2-PPh<sub>2</sub>.

|                         |       | C <sup>[a]</sup> | H <sup>[a]</sup> | N <sup>[a]</sup> | Br <sup>[b]</sup> | P <sup>[b]</sup> | Cu <sup>[b]</sup> |
|-------------------------|-------|------------------|------------------|------------------|-------------------|------------------|-------------------|
|                         |       | (wt%)            | (wt%)            | (wt%)            | (wt%)             | (wt%)            | (wt%)             |
| COFs-1                  | Exp.  | 52.8             | 2.5              | 10.9             | 30.5±4.2          | ~                | ~                 |
|                         | Theo. | 53.7             | 2.4              | 11.4             | 32.5              | ~                | ~                 |
| COFs-1-PPh <sub>2</sub> | Exp.  | 70.6             | 4.6              | 9.8              | 14.3±3.1          | 4.7±1.1          | 0.05±0.01         |
|                         | Theo. | 78.6             | 4.6              | 8.0              | 0                 | 8.8              | ~                 |
| COFs-2                  | Exp.  | 57.8             | 2.7              | 5.6              | 31.2±5.1          | ~                | ~                 |
|                         | Theo. | 58.8             | 2.9              | 5.7              | 32.7              | ~                | ~                 |
| COFs-2-PPh <sub>2</sub> | Exp.  | 68.1             | 4.7              | 5.3              | 8.9±1.9           | 3.5±0.8          | 0.08±0.02         |
|                         | Theo. | 82.3             | 4.9              | 4.0              | 0                 | 8.9              | ~                 |

[a] Determined by elemental analyses. [b] Determined by EDX equipped on SEM (Take the average of the five tests).

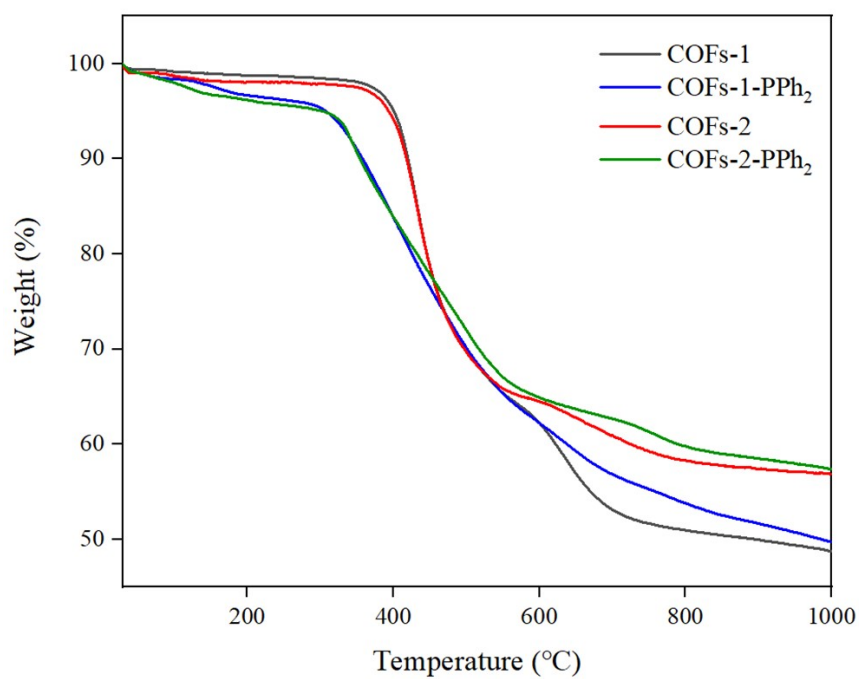

Figure S3. TGA of COFs-1, COFs-1-PPh<sub>2</sub>, COFs-2 and COFs-2-PPh<sub>2</sub>.

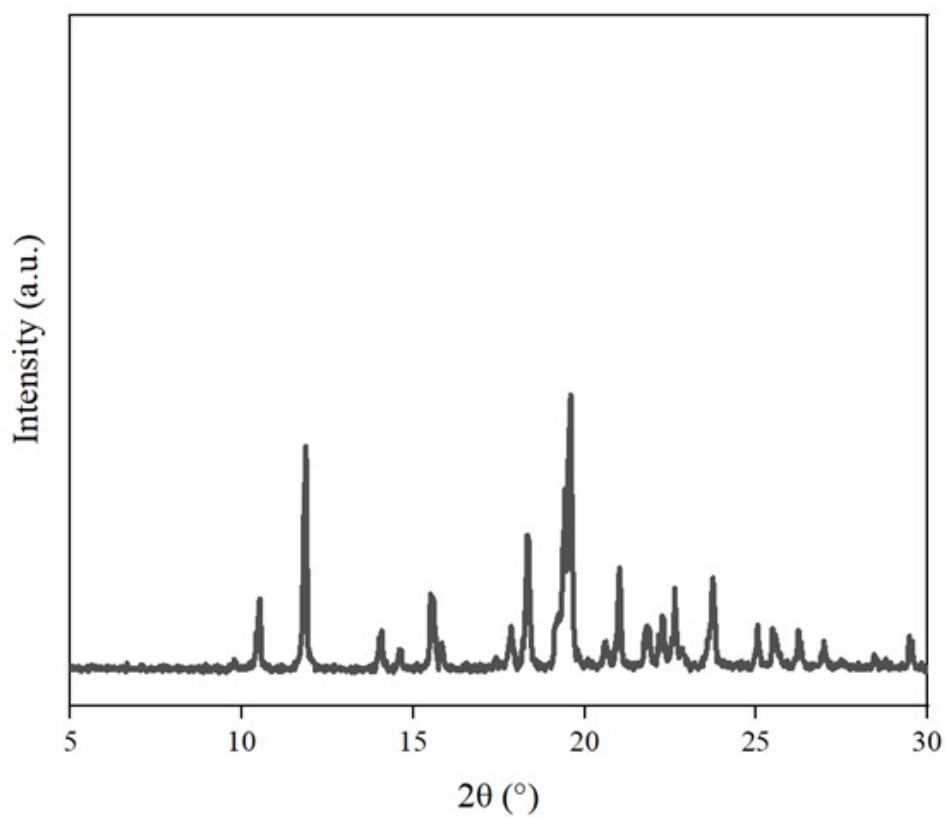

Figure S4. PXRD of PPh<sub>3</sub>.

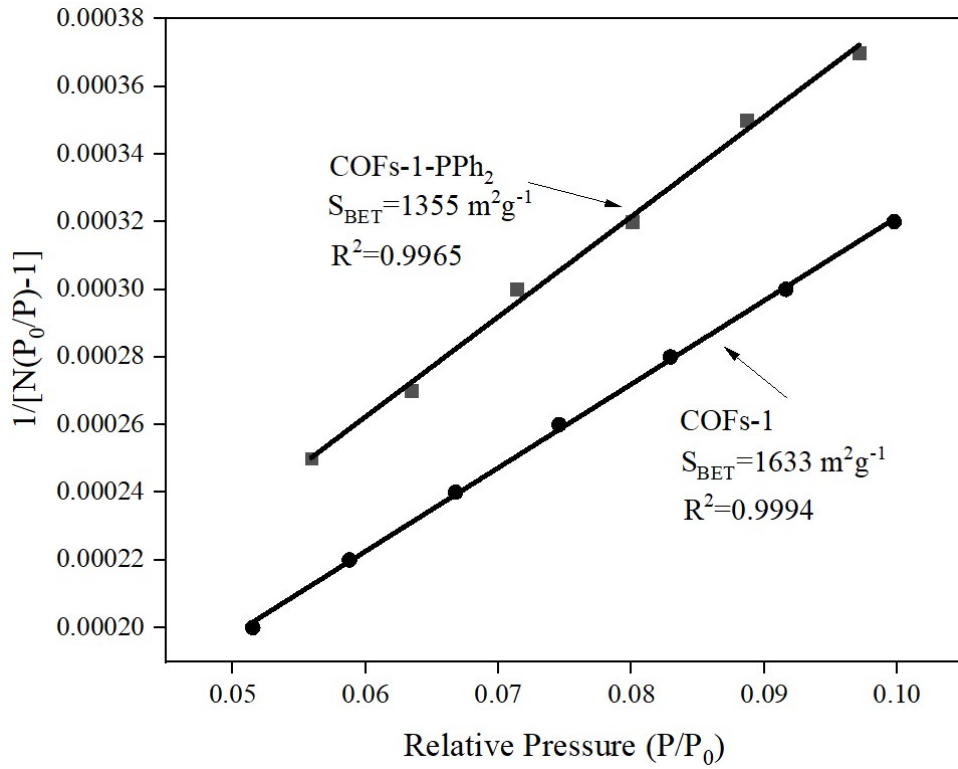

Figure S5. BET plot of COFs-1 and COFs-1-PPh<sub>2</sub>.

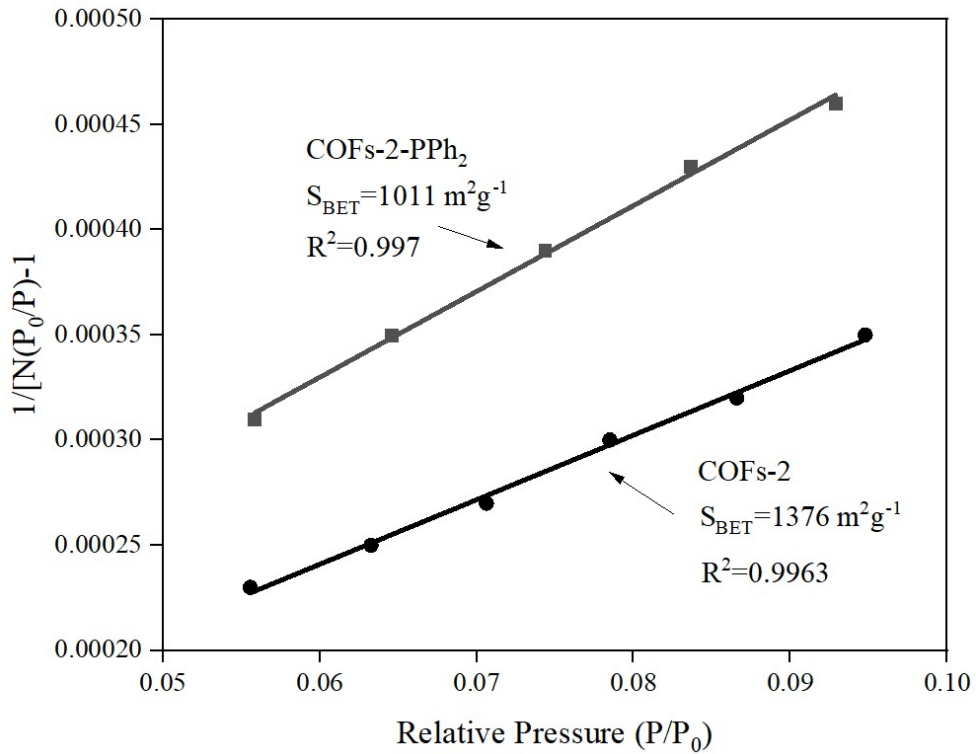

Figure S6. BET plot of COFs-2 and COFs-2-PPh<sub>2</sub>.

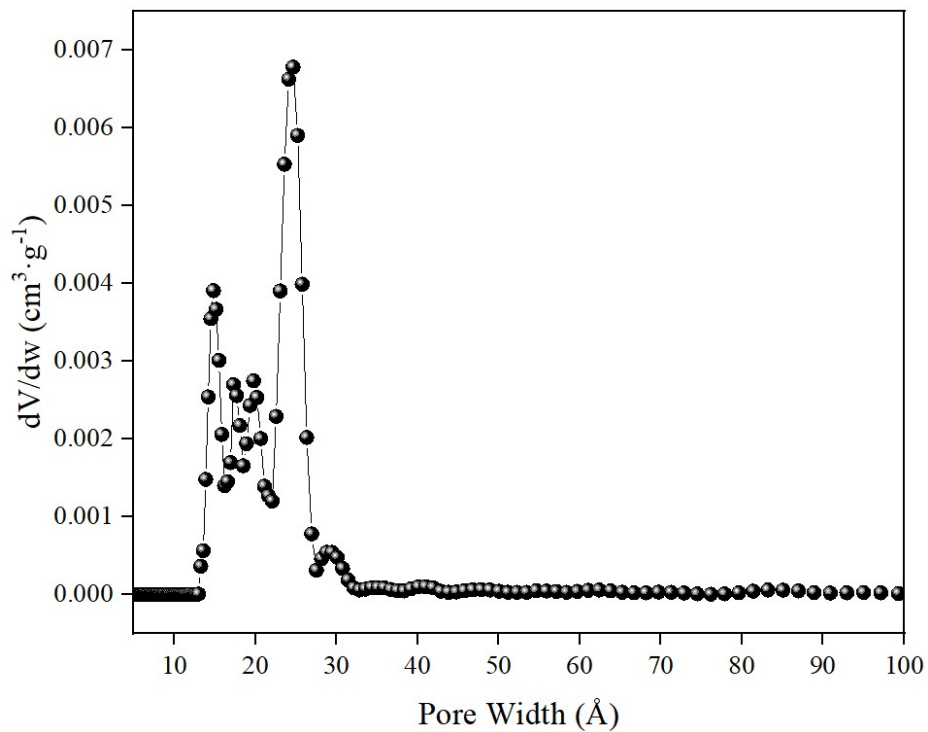

Figure S7. Pore size distribution profiles of COF-1.

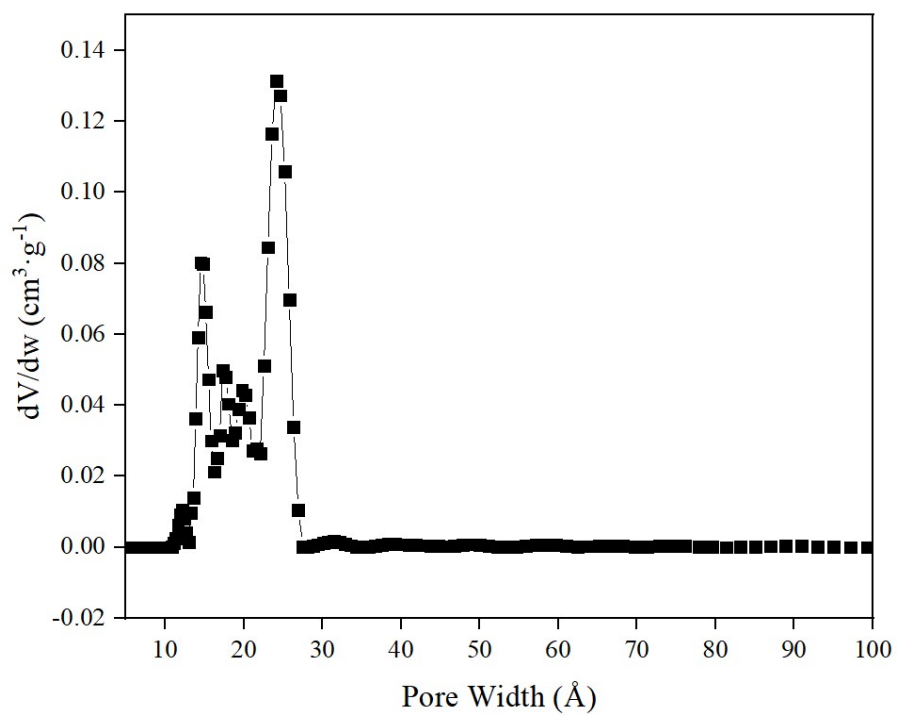

Figure S8. Pore size distribution profiles of COF-1-PPh<sub>2</sub>.

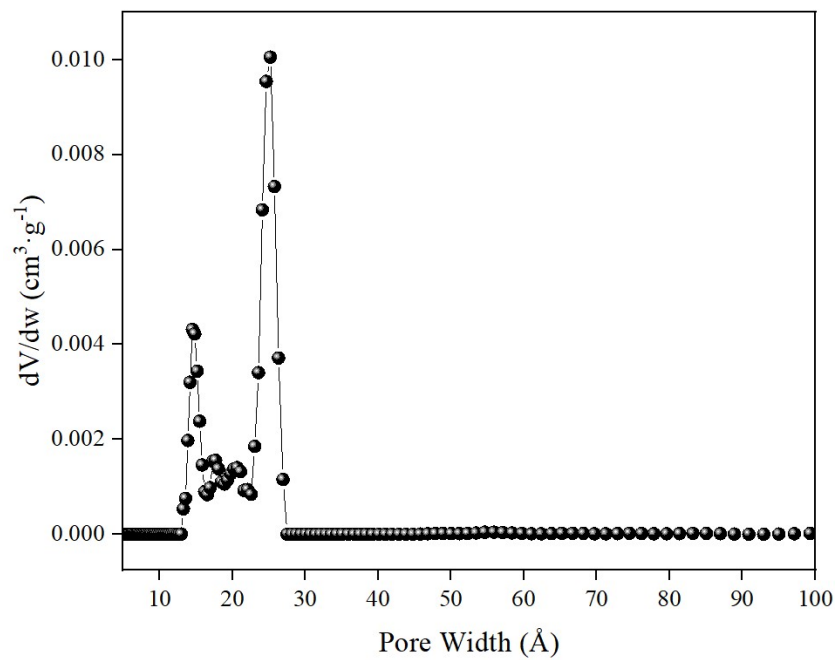

Figure S9. Pore size distribution profiles of COF-2.

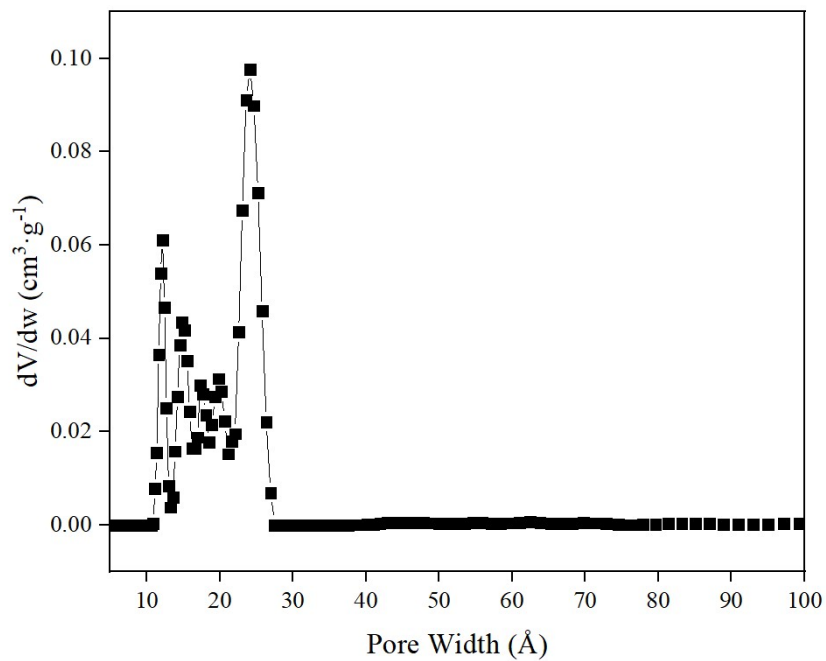

Figure S10. Pore size distribution profiles of COF-2-PPh<sub>2</sub>.

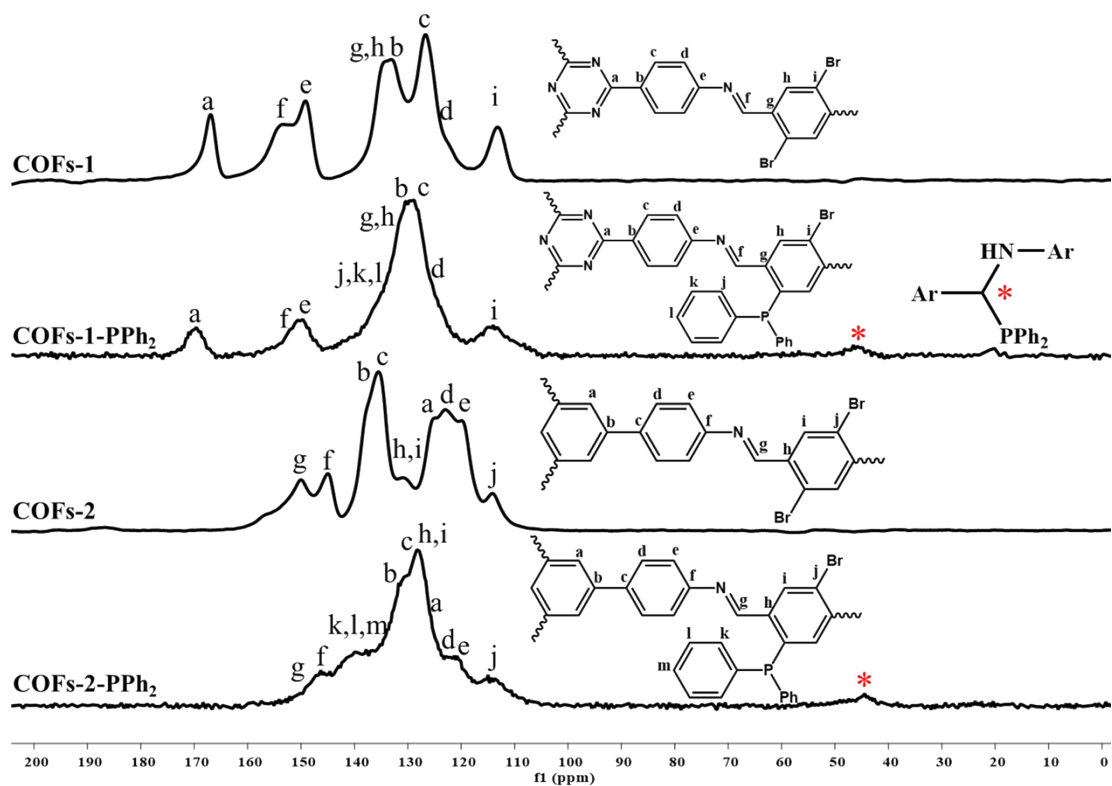

Figure S11. Solid-state  $^{13}\text{C}$  NMR spectral changes of COFs-1, COFs-1-PPh<sub>2</sub>, COFs-2 and COFs-2-PPh<sub>2</sub>.

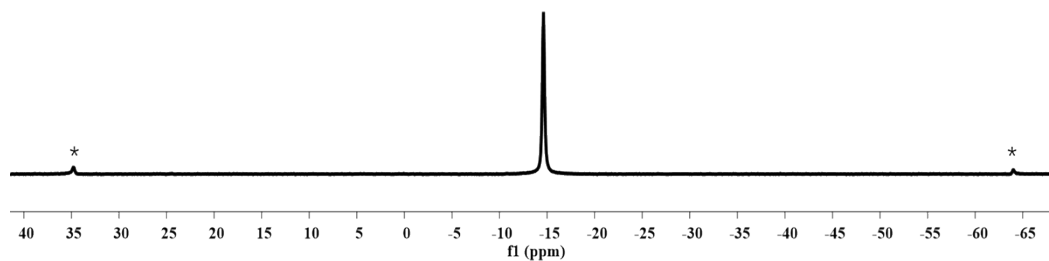

Figure S12. Solid-state  $^{31}\text{P}$  NMR spectral of Br-free-COFs-1-P. Asterisks denote spinning sidebands

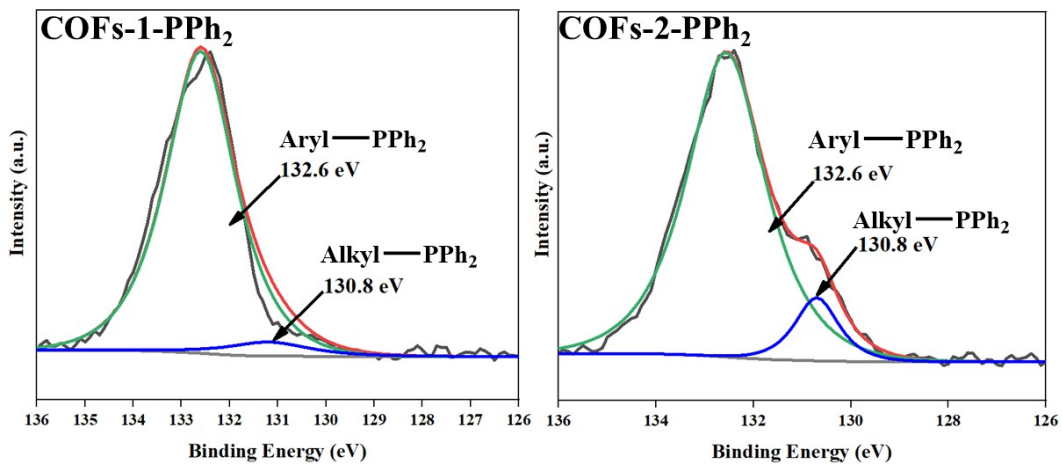

Figure S13.  $P_{2p}$  XPS spectra of COFs-1- $PPh_2$  and COFs-2- $PPh_2$ .

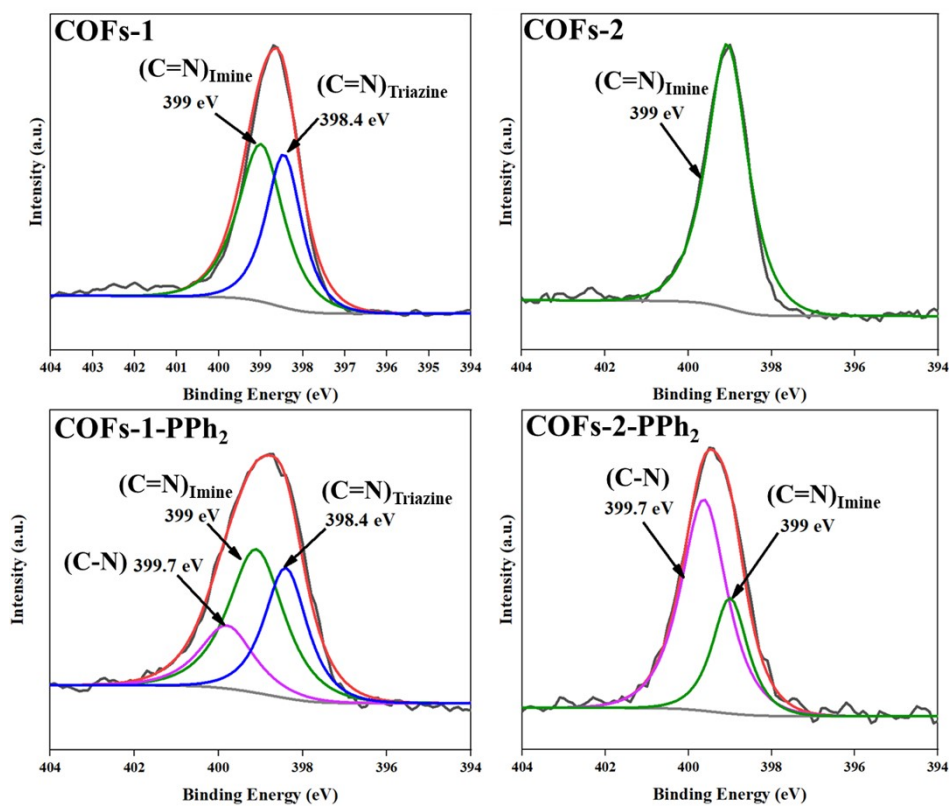

Figure S14.  $N_{1s}$  XPS spectra of COFs-1, COFs-1- $PPh_2$ , COFs-2 and COFs-2- $PPh_2$ .



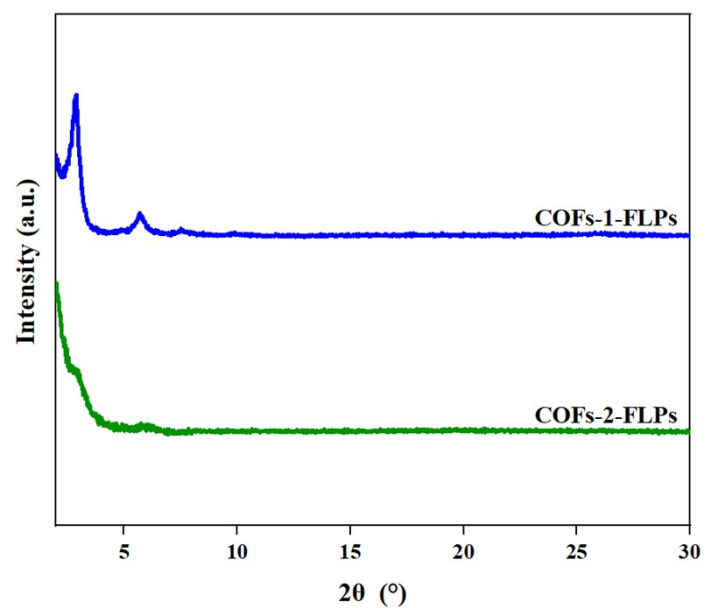

Figure S15. PXRD of COFs-1-FLPs and COFs-2-FLPs before hydrogenation reaction.

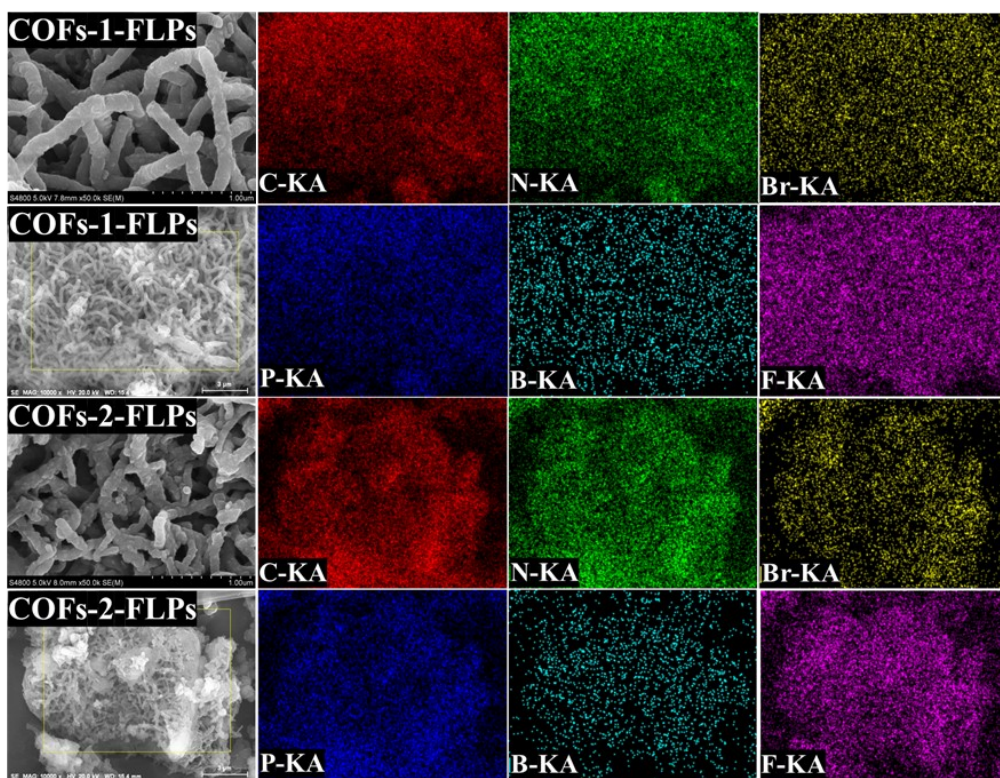

Figure S16. The SEM and EDX mapping images of COFs-1-FLPs and COFs-2-FLPs.

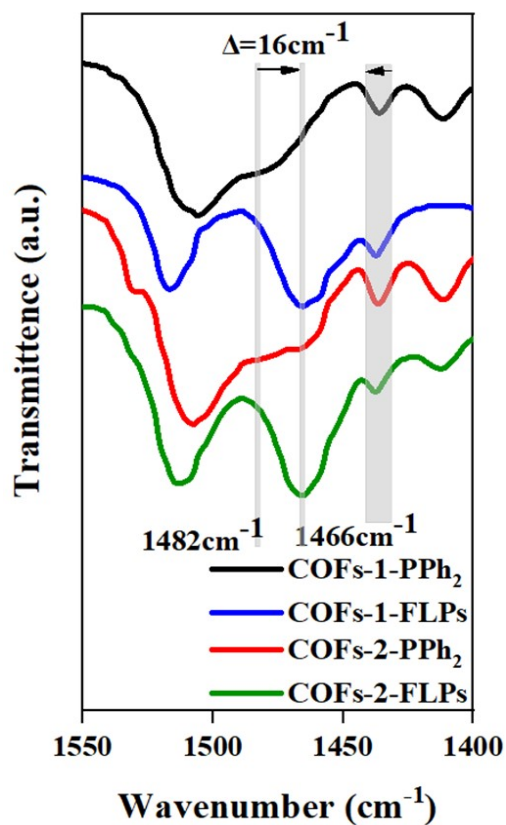

Figure S17. The FT-IR spectra of COFs-1-PPh<sub>2</sub>, COFs-1-FLPs, COFs-2-PPh<sub>2</sub> and COFs-2-FLPs.

Table S2. Investigation of COFs/BCF, COFs-FLPs and Br-free-COFs-1-P/BCF in the catalytic hydrogenation of 5-decyne to Z-5-decene.

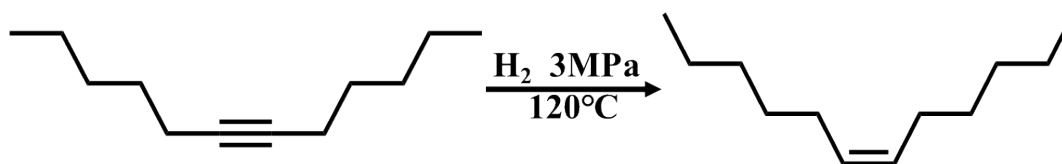

| Entry | Catalyst             | T/h | Conversion/% |
|-------|----------------------|-----|--------------|
| 1     | COFs-1/BCF           | 48  | 5            |
| 2     | COFs-2/BCF           | 48  | 0            |
| 3     | COFs-1-FLPs          | 36  | 88           |
| 4     | COFs-2-FLPs          | 36  | 87           |
| 5     | Br-free-COFs-1-P/BCF | 48  | 14           |

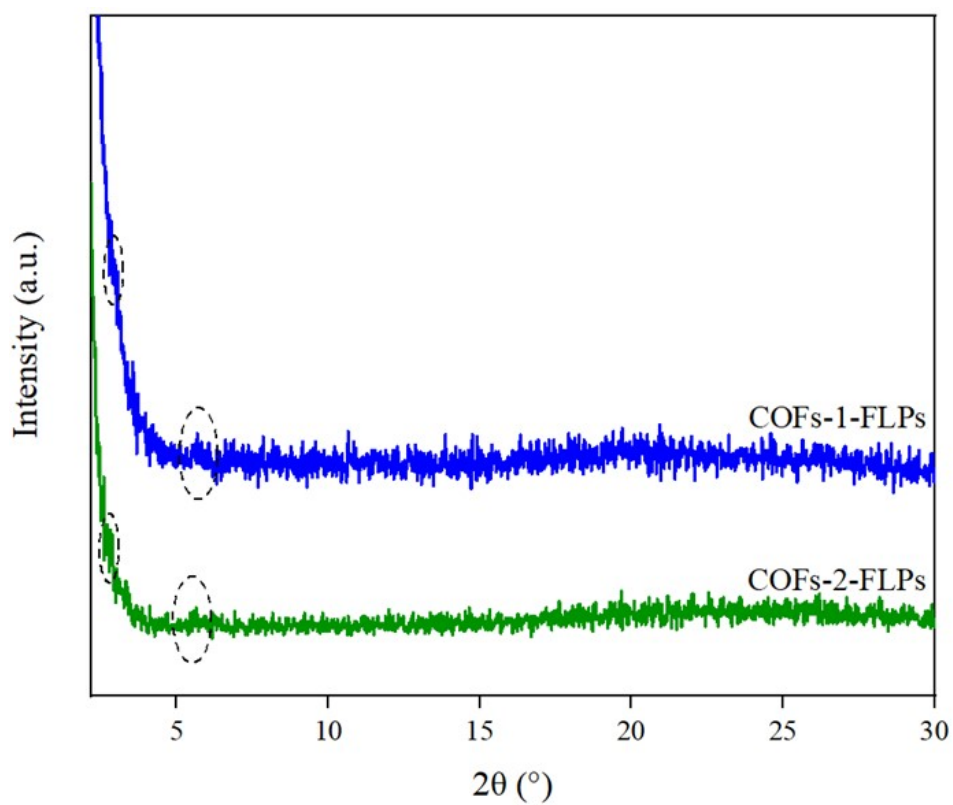

Figure S18. PXRD of COFs-1-FLPs and COFs-2-FLPs after 10 runs.

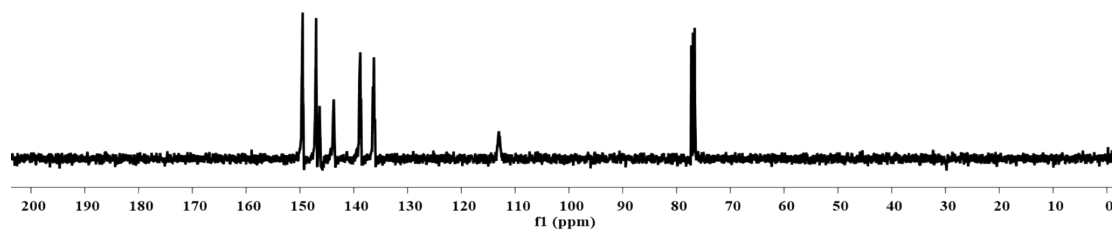

Figure S19. <sup>13</sup>C NMR spectrum of BCF (in CDCl<sub>3</sub>, 101 MHz).

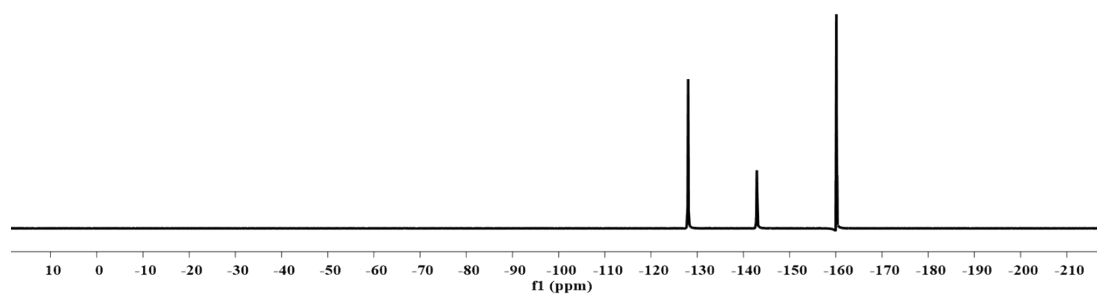

Figure S20.  $^{19}\text{F}$  NMR spectrum of BCF (in  $\text{CDCl}_3$ , 376 MHz).

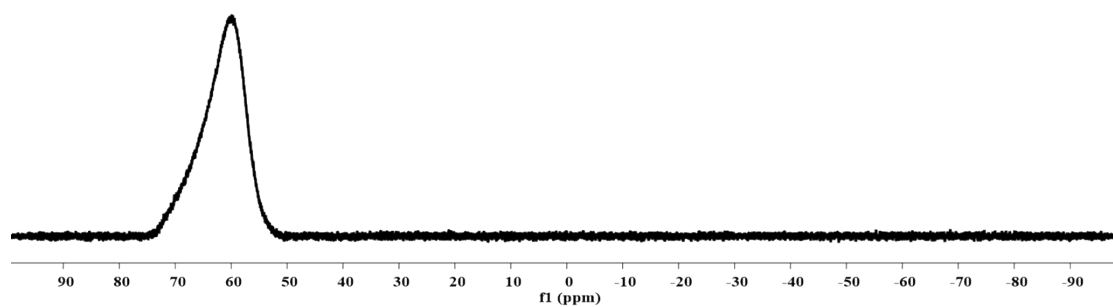

Figure S21.  $^{11}\text{B}$  NMR spectrum of BCF (in  $\text{CDCl}_3$ , 128 MHz).

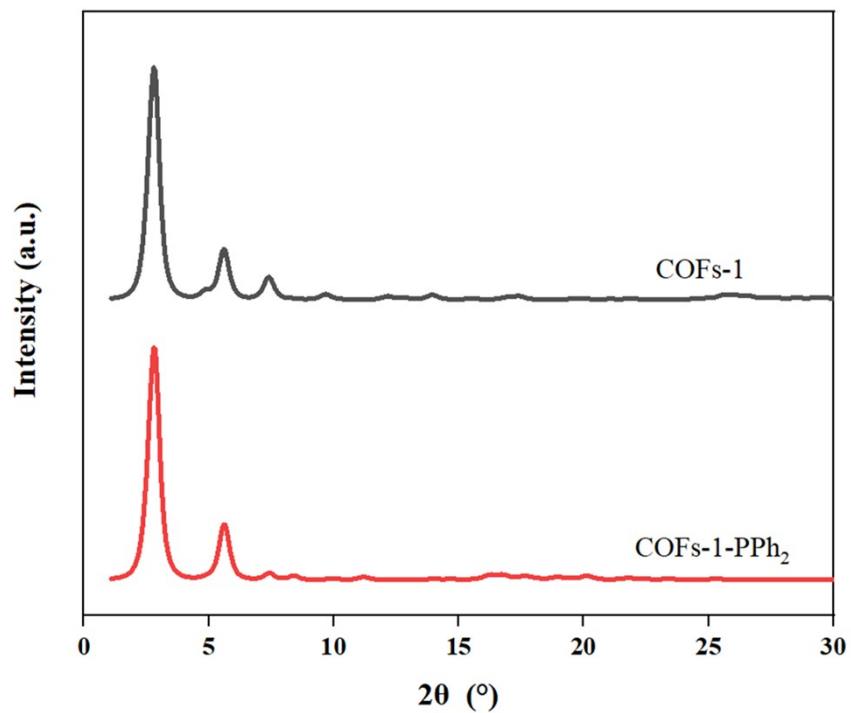

Figure S22. Simulated theoretical PXRD patterns of COFs-1 and COFs-1-PPh<sub>2</sub>. (Br was completely replaced by -PPh<sub>2</sub>)

## 2. Original MS data

1.

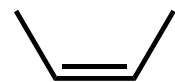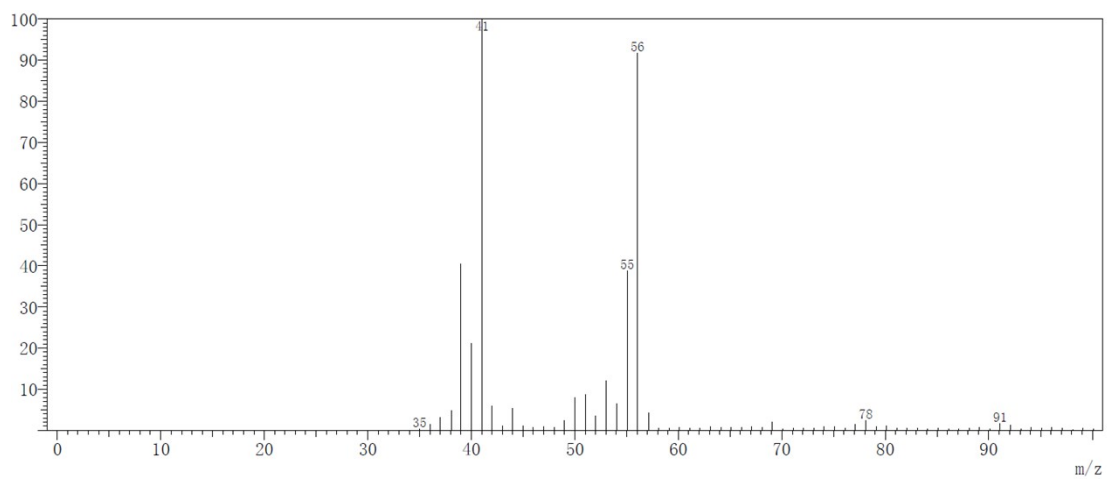

2.

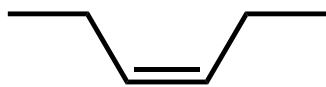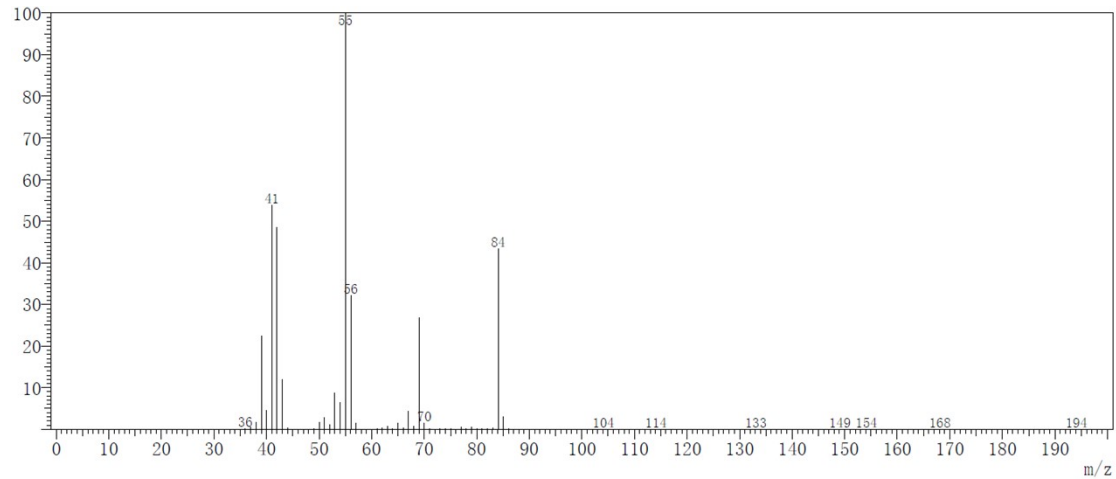

3.

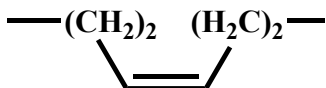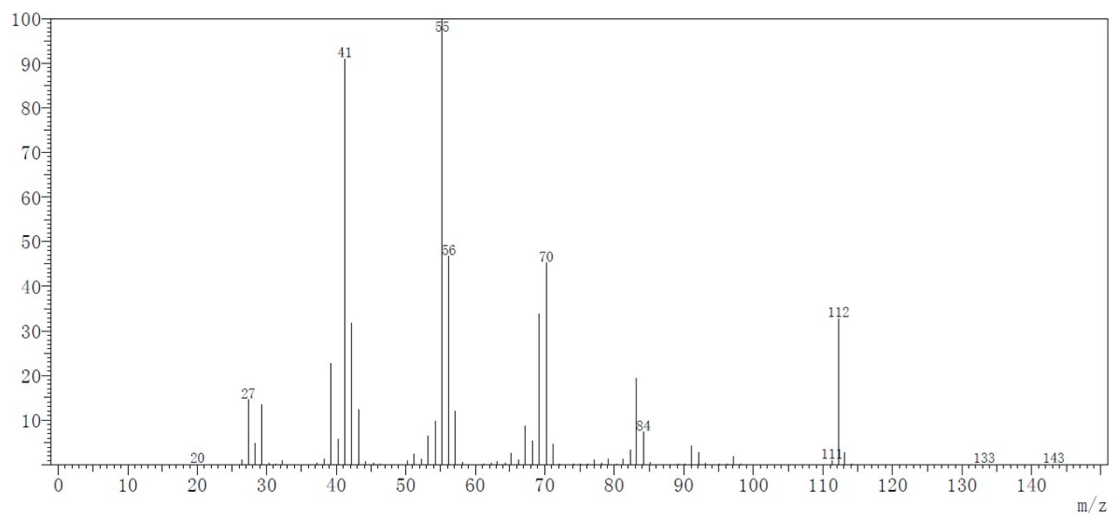

4.

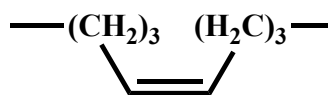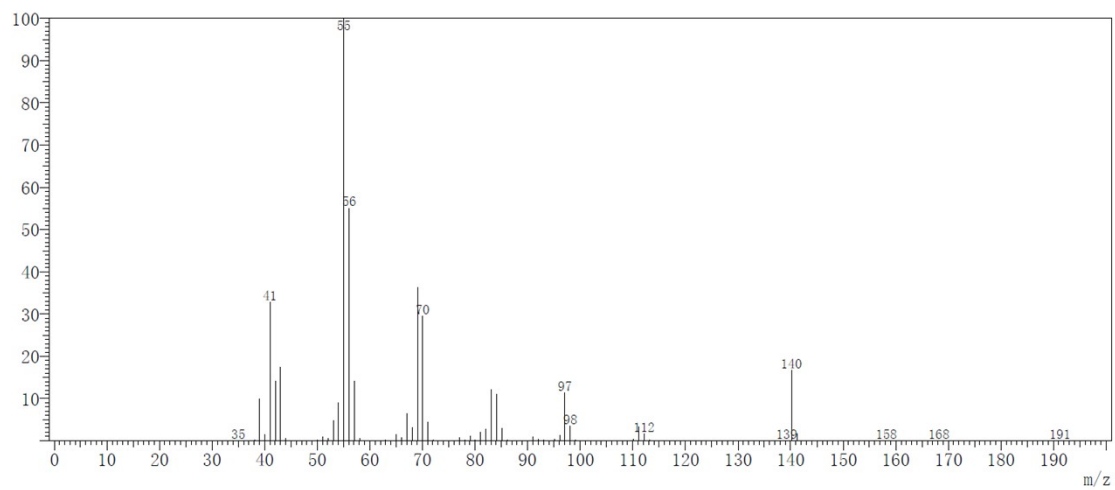

5.

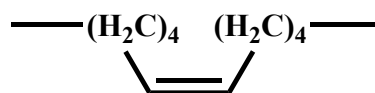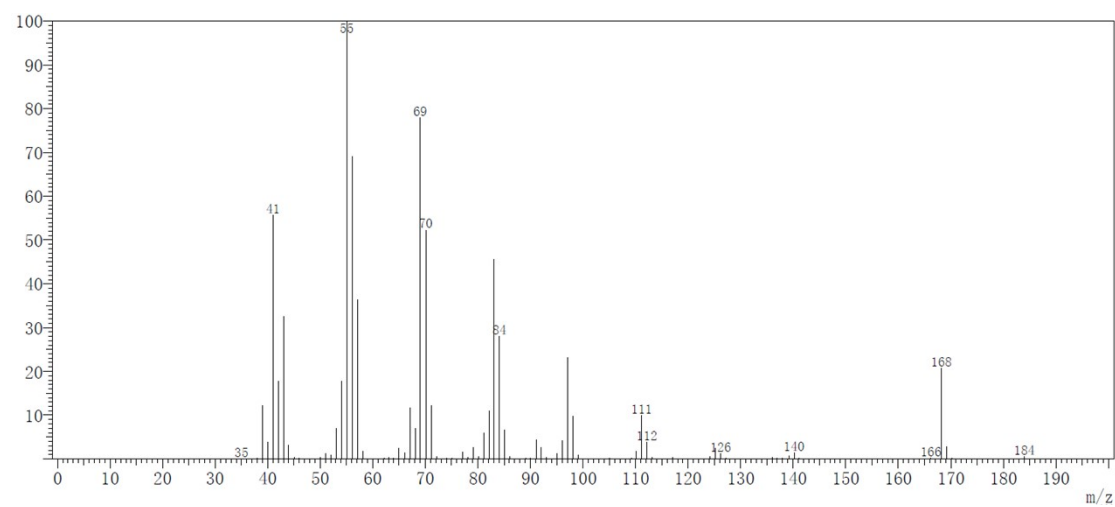

6.

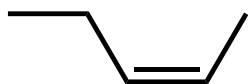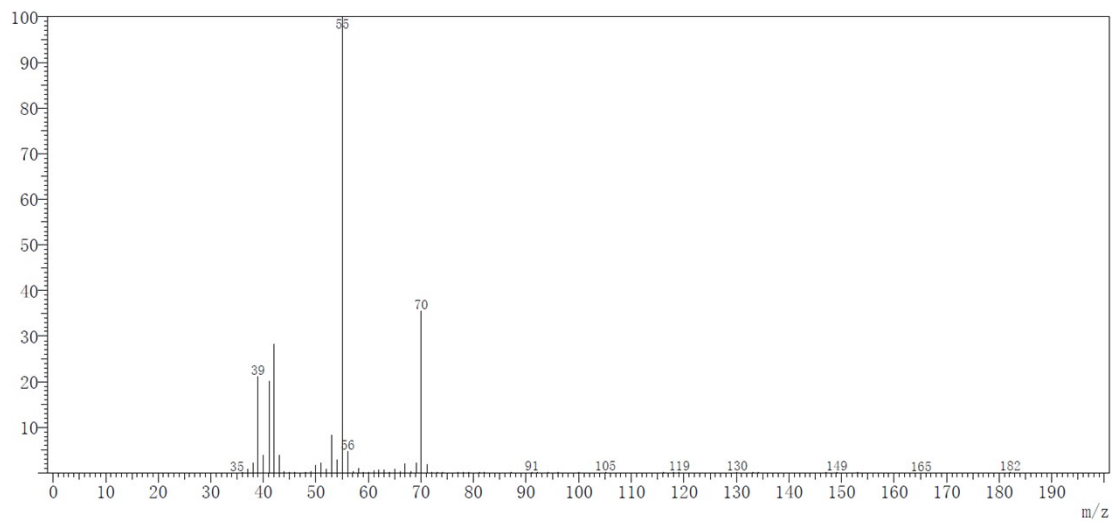

7.

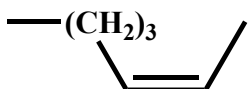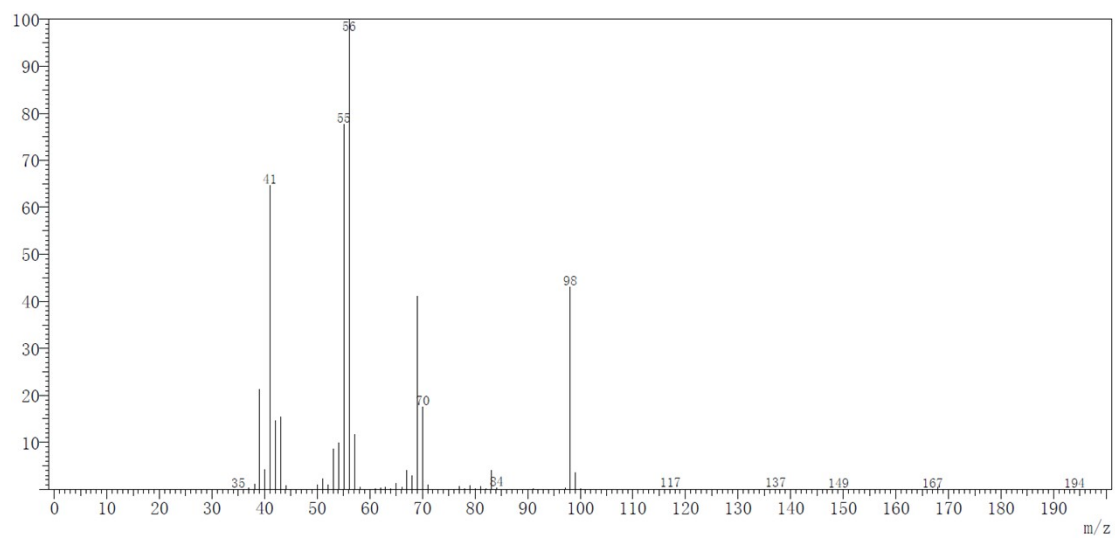



8.

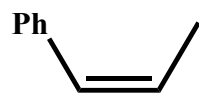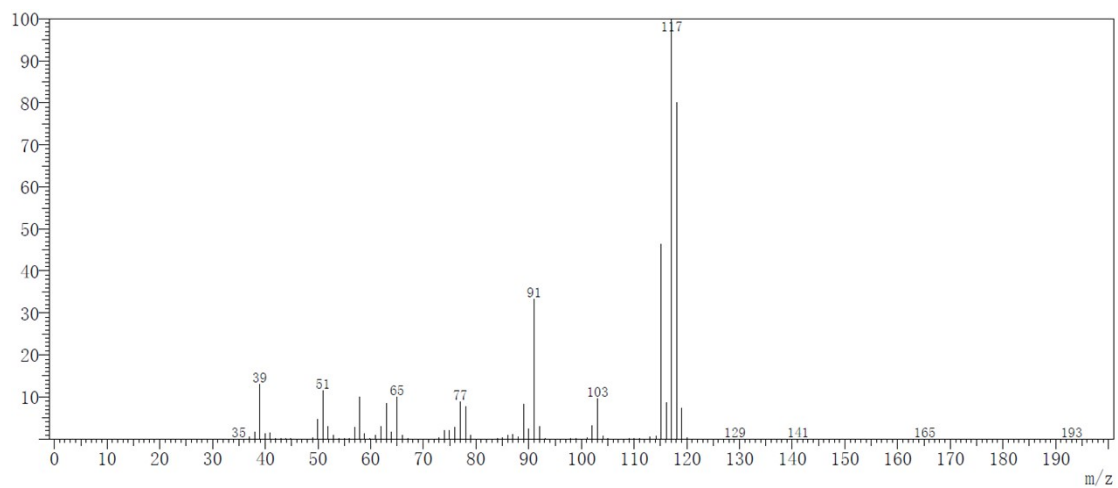

9.

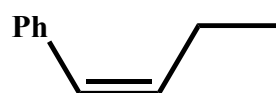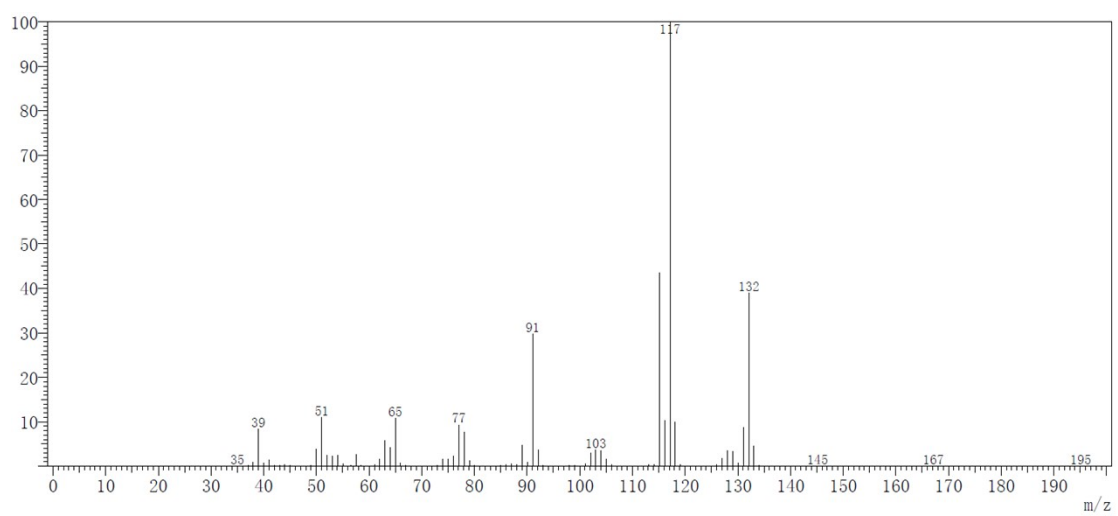

10.

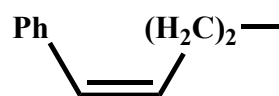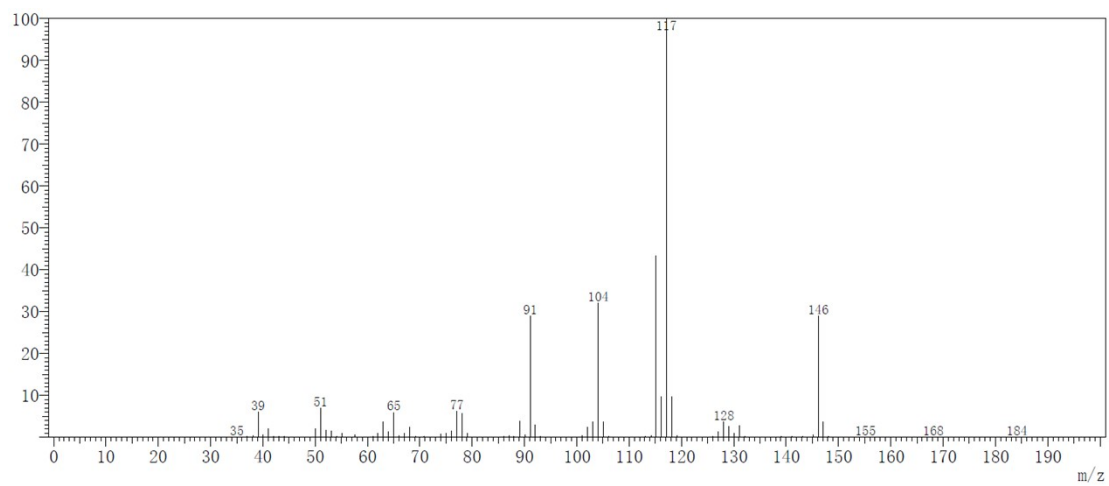

11.

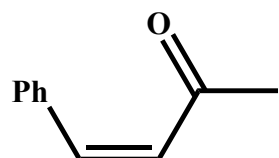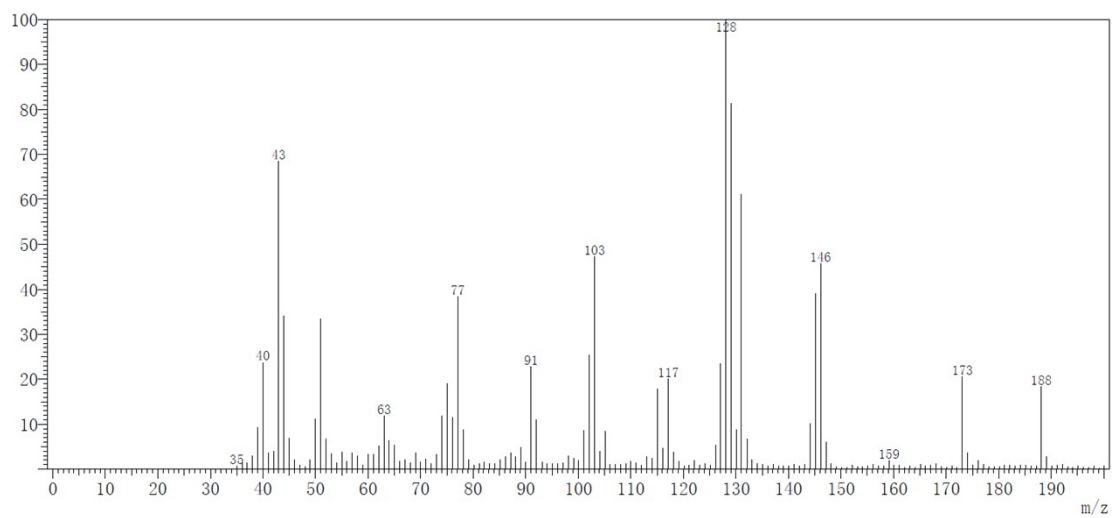

12.

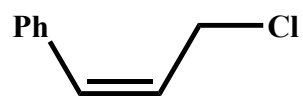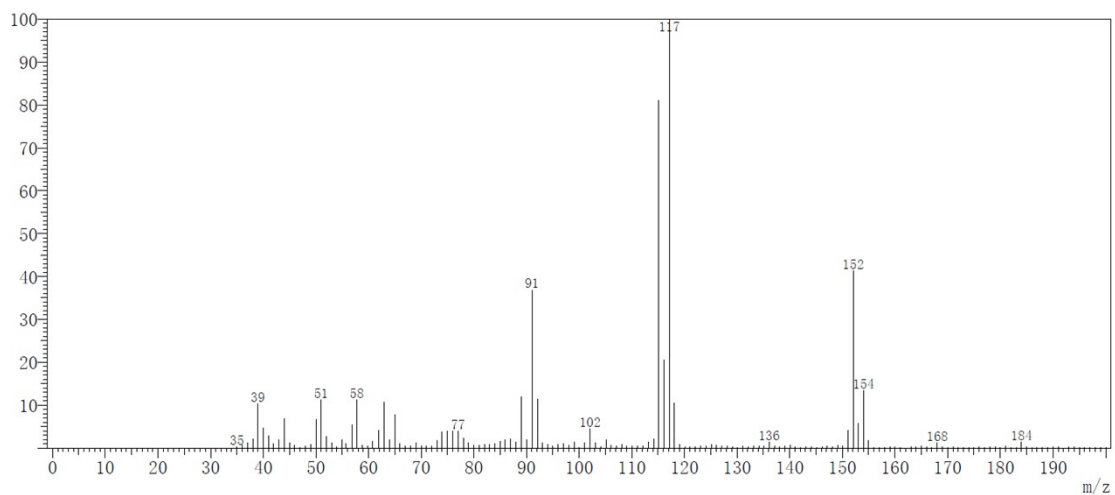

13.

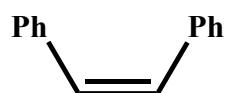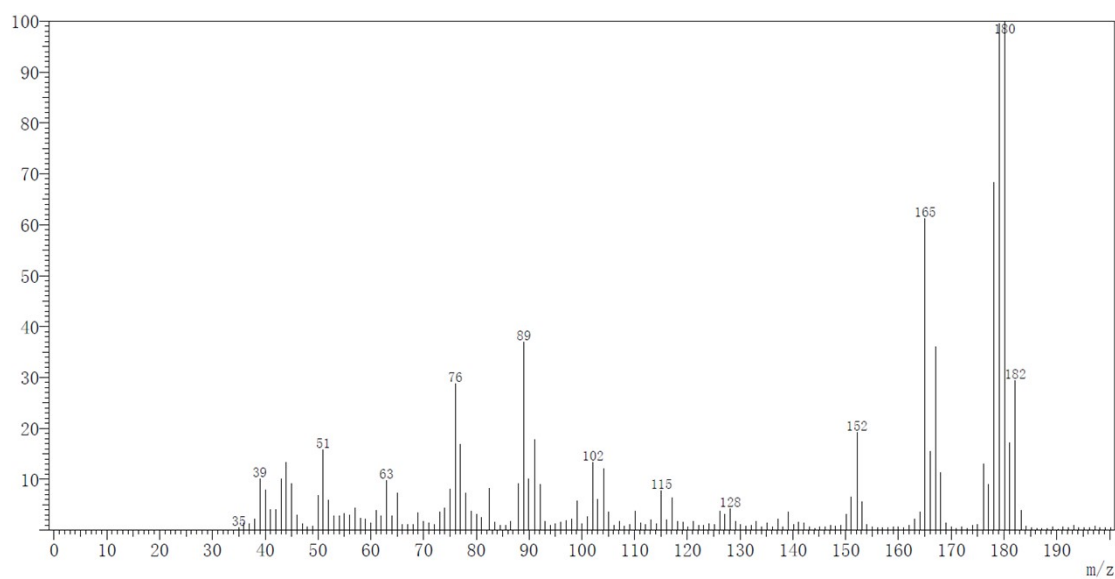

Reference:

1. M. Ullrich, A. J. Lough, D. W. Stephan, *J. Am. Chem. Soc.* **2009**, *131*, 52–53.
